# Supplementary material for: Modulation of the Berry Skin Transcriptome of cv. Tempranillo Induced by Water Stress Levels
Source: MDPI journal article supplement (doi:10.3390/plants12091778), 2023-04-26
Supplement: s1 [file s1]

**Supplementary Figure.** Correlation between biological replicates in RNA-seq.

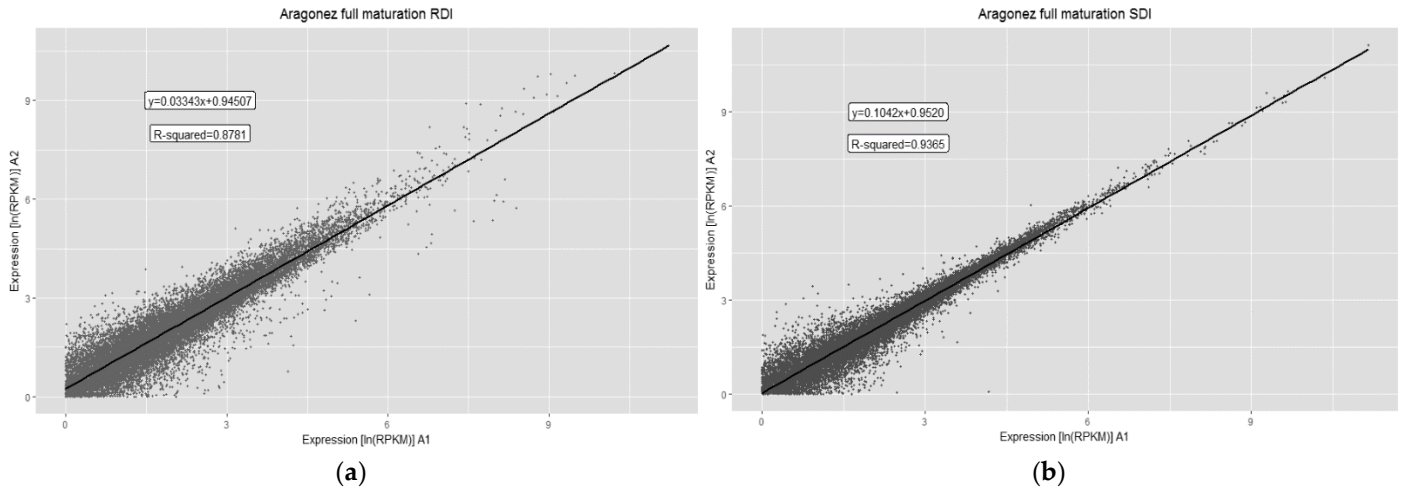

**Supplementary Figure S1.** Correlation between the logarithmized Reads per Kilobase transcript per Million reads (RPKM) of two biological replicates (in the X and Y axes). Dots represent the transcripts. Pearson Method was used to calculate linear regression (black line). Coefficient of determination (R-squared) and the linear regression equation are provided; **(a)** full maturation SDI; **(b)** full maturation RDI.
